# Supplementary material
Source: Springer Nature journal article supplement (https://www.springermedizin.de/resource/supplementary/12889_2010_2527_MOESM4_ESM.pdf/9486320)

# The Theory of Planned Behaviour

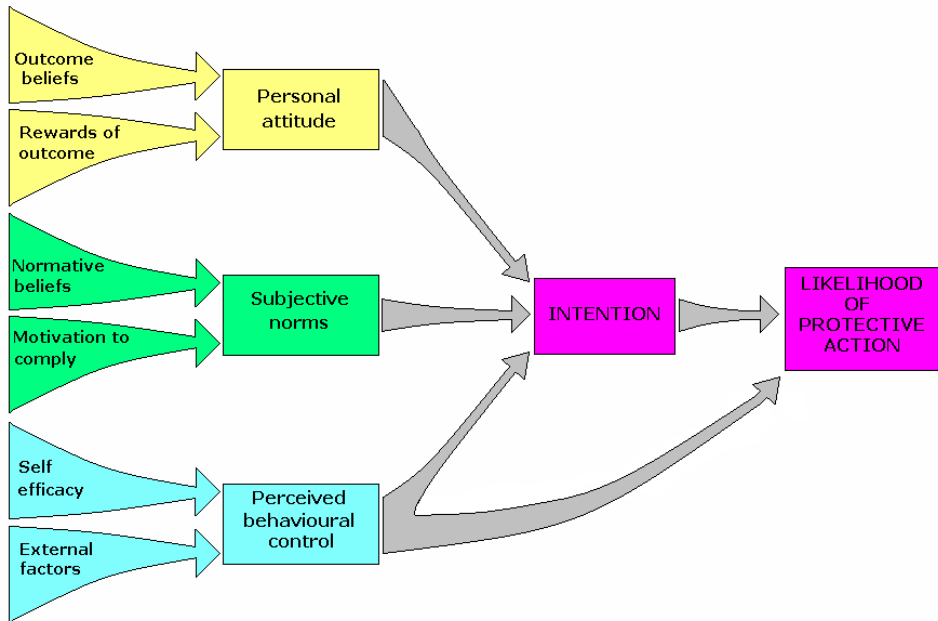

Supplement: MOESM4 [file 9486320]
